# Supplementary material
Source: PubMed Central journal article supplement (PMC2254309)

# Supplementary Figure 1

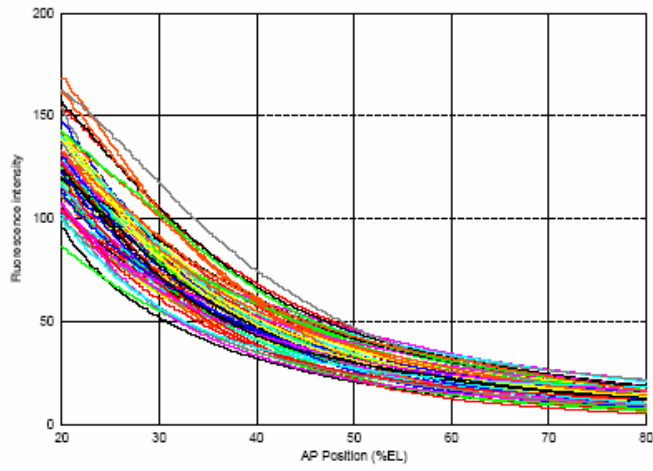

A

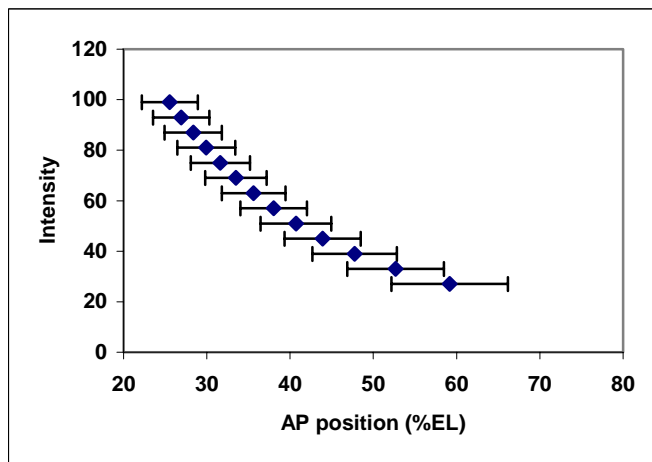

B

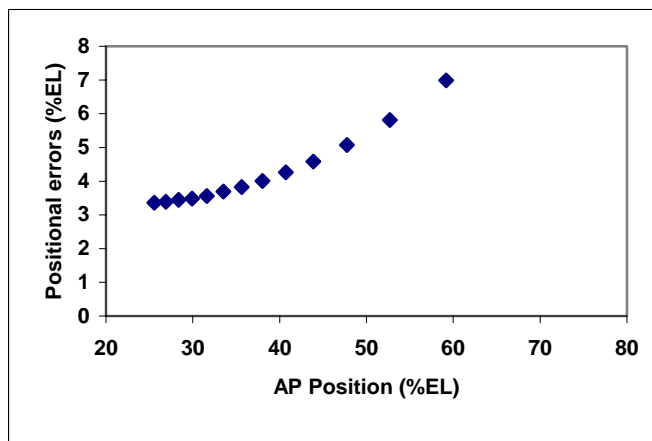

C

Supplement: NIHMS39266-supplement-Fig__1_Suppl_.pdf [file NIHMS39266-supplement-Fig__1_Suppl_.pdf]

**Supplementary Figure 2**

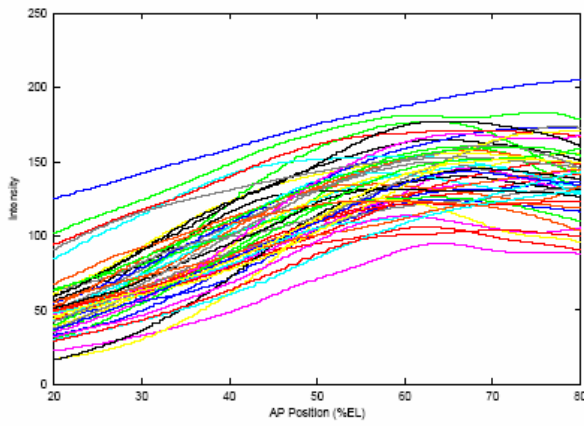

**A**

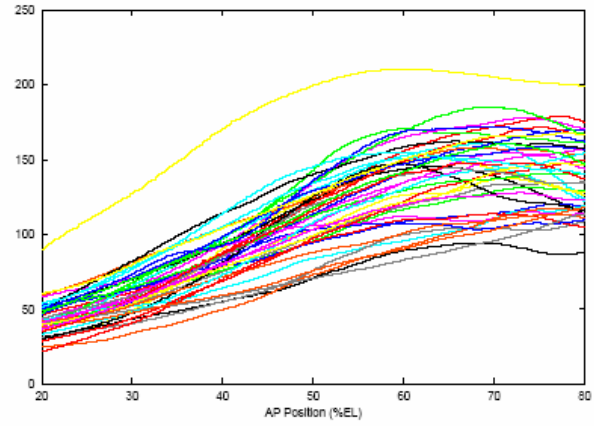

**D**

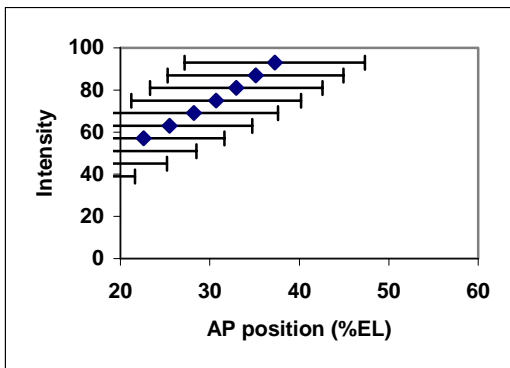

**B**

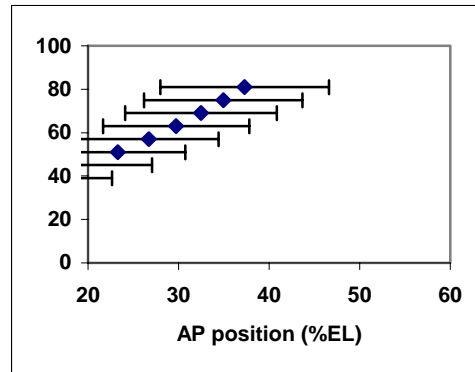

**E**

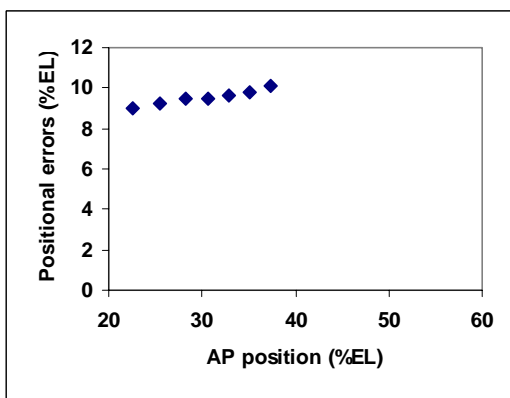

**C**

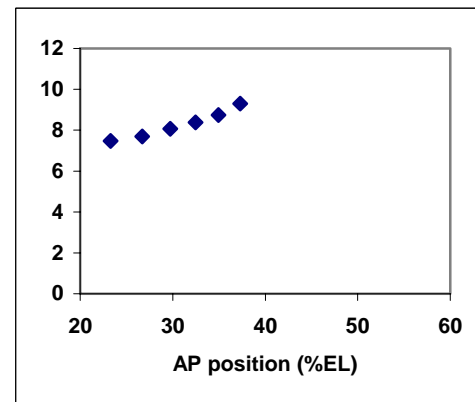

**F**

Supplement: NIHMS39266-supplement-Fig__2_Suppl_.pdf [file NIHMS39266-supplement-Fig__2_Suppl_.pdf]

**Supplementary Figure 3**

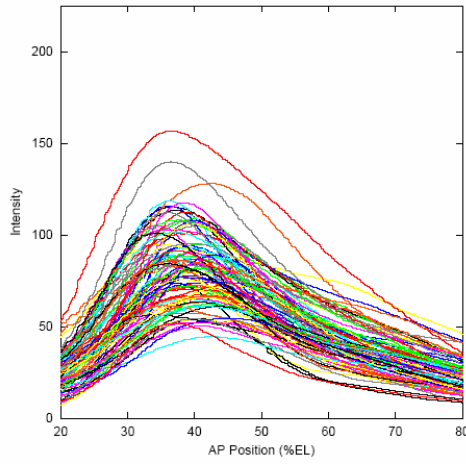

**A**

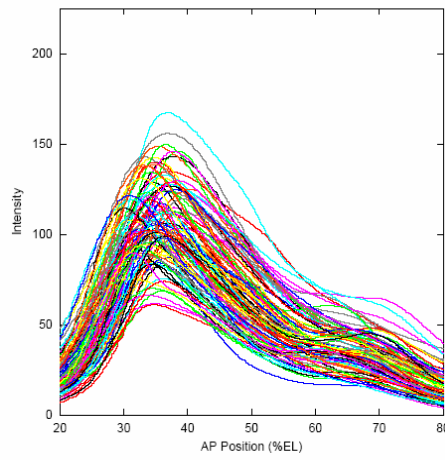

**D**

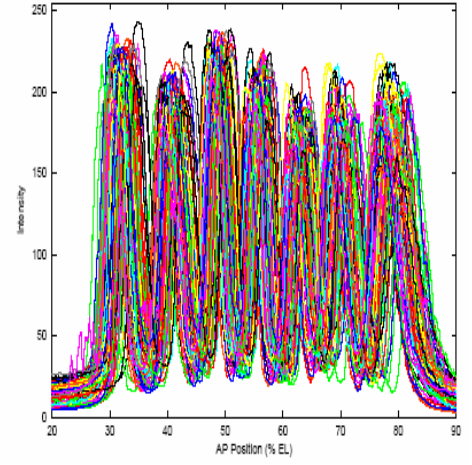

**G**

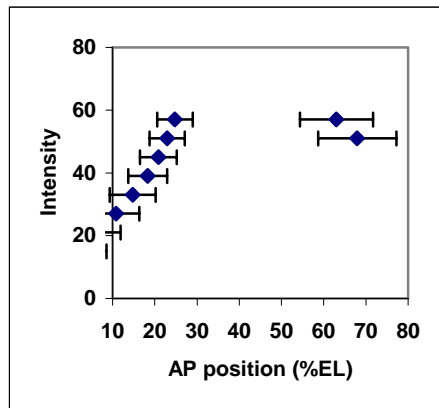

**B**

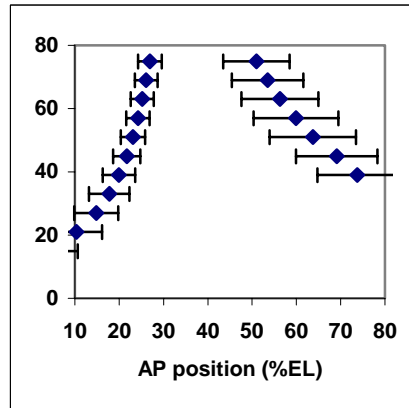

**E**

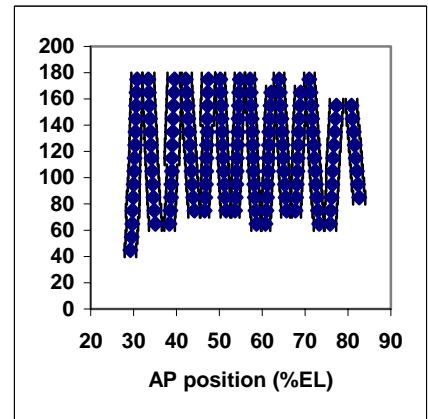

**H**

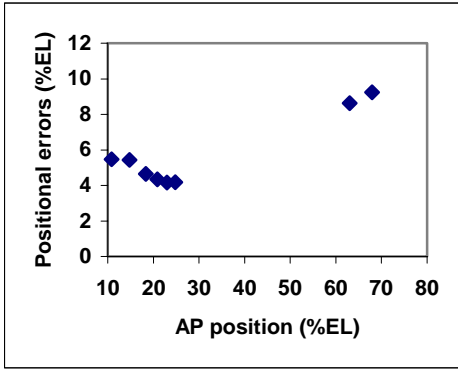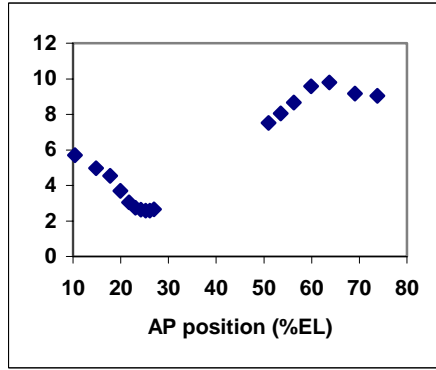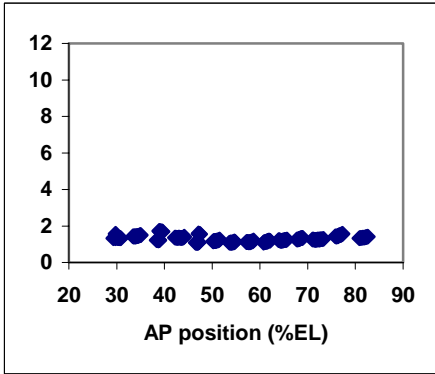

C

F

I

Supplement: NIHMS39266-supplement-Fig__3_Suppl_.pdf [file NIHMS39266-supplement-Fig__3_Suppl_.pdf]

**Supplementary Figure 4**

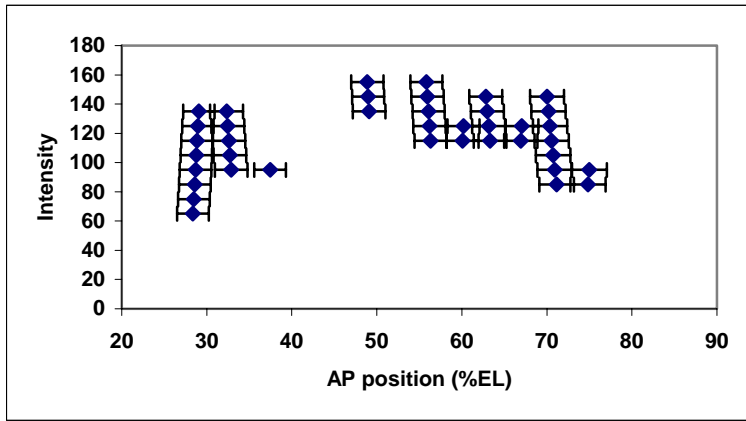

A

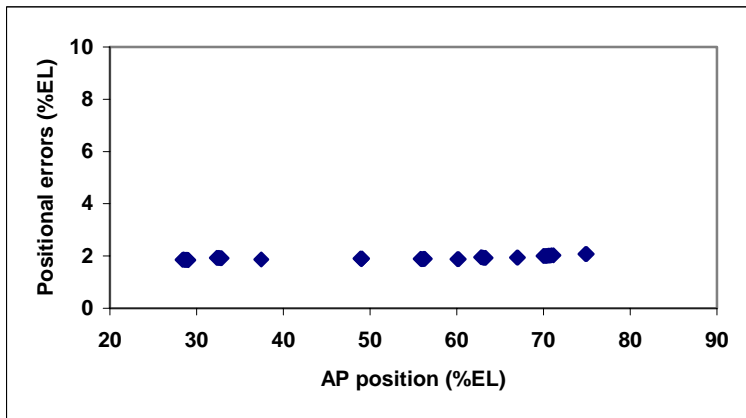

B

Supplement: NIHMS39266-supplement-Fig__4_Suppl_.pdf [file NIHMS39266-supplement-Fig__4_Suppl_.pdf]
